# Supplementary material
Source: HighWire-hosted journal article supplement (https://jnm.snmjournals.org/highwire/filestream/95018/field_highwire_adjunct_files/0/176404_Supplemental_Data.pdf)
Supplement: 176404_Supplemental_Data.pdf [file 176404_Supplemental_Data.pdf]

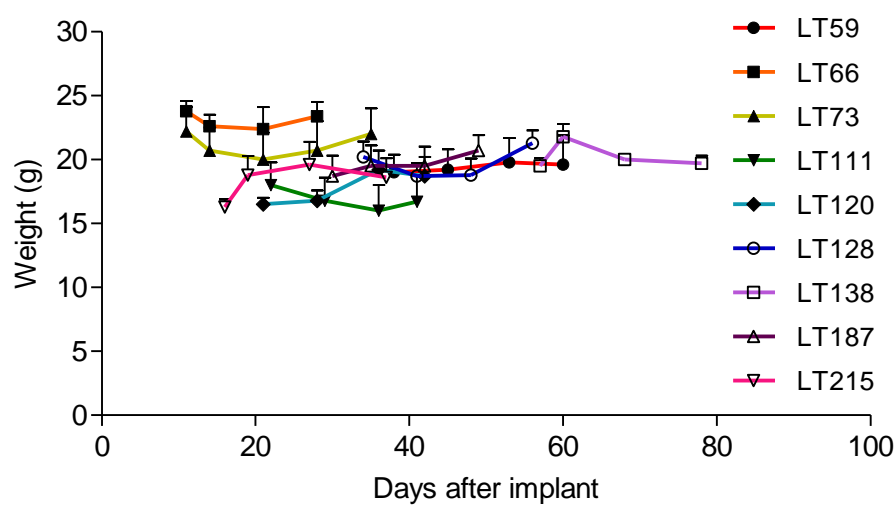

**Supplemental Figure 1.** Animal weight during the observation period.

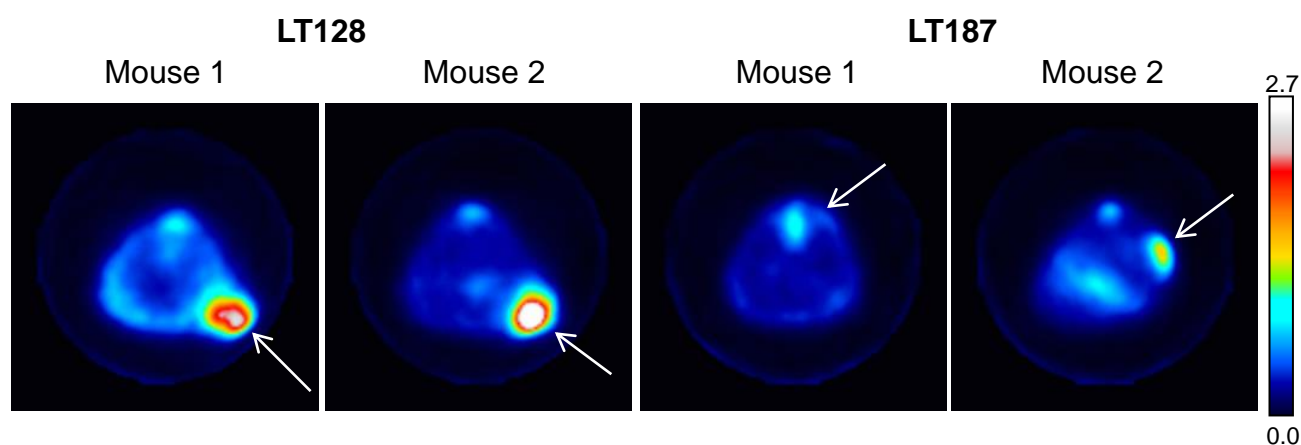

**Supplemental Figure 2.** Transaxial  $^{18}\text{F}$ -FDG PET scans of two representative LT128 and LT187 mice with same tumor dimension but different uptake. Color scale is expressed as SUV. Arrows indicate lesion.
